# Supplementary material for: Unexpected Efficacy of a Novel Sodium Channel Modulator in Dravet Syndrome
Source: PubMed Central journal article supplement (PMC5431801; doi:10.1038/s41598-017-01851-9), 2017-05-10
Supplement: 41598_2017_1851_MOESM1_ESM.pdf [file 41598_2017_1851_MOESM1_ESM.pdf]

# Unexpected Efficacy of a Novel Sodium Channel Modulator in Dravet Syndrome

Lyndsey L. Anderson, Nicole A Hawkins, Christopher H. Thompson,  
Jennifer A. Kearney and Alfred L. George, Jr.

## EXTENDED DATA FIGURES

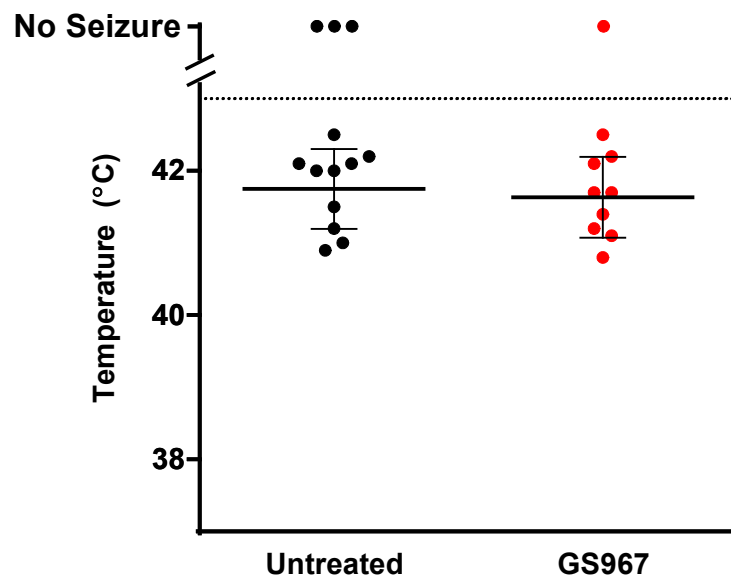

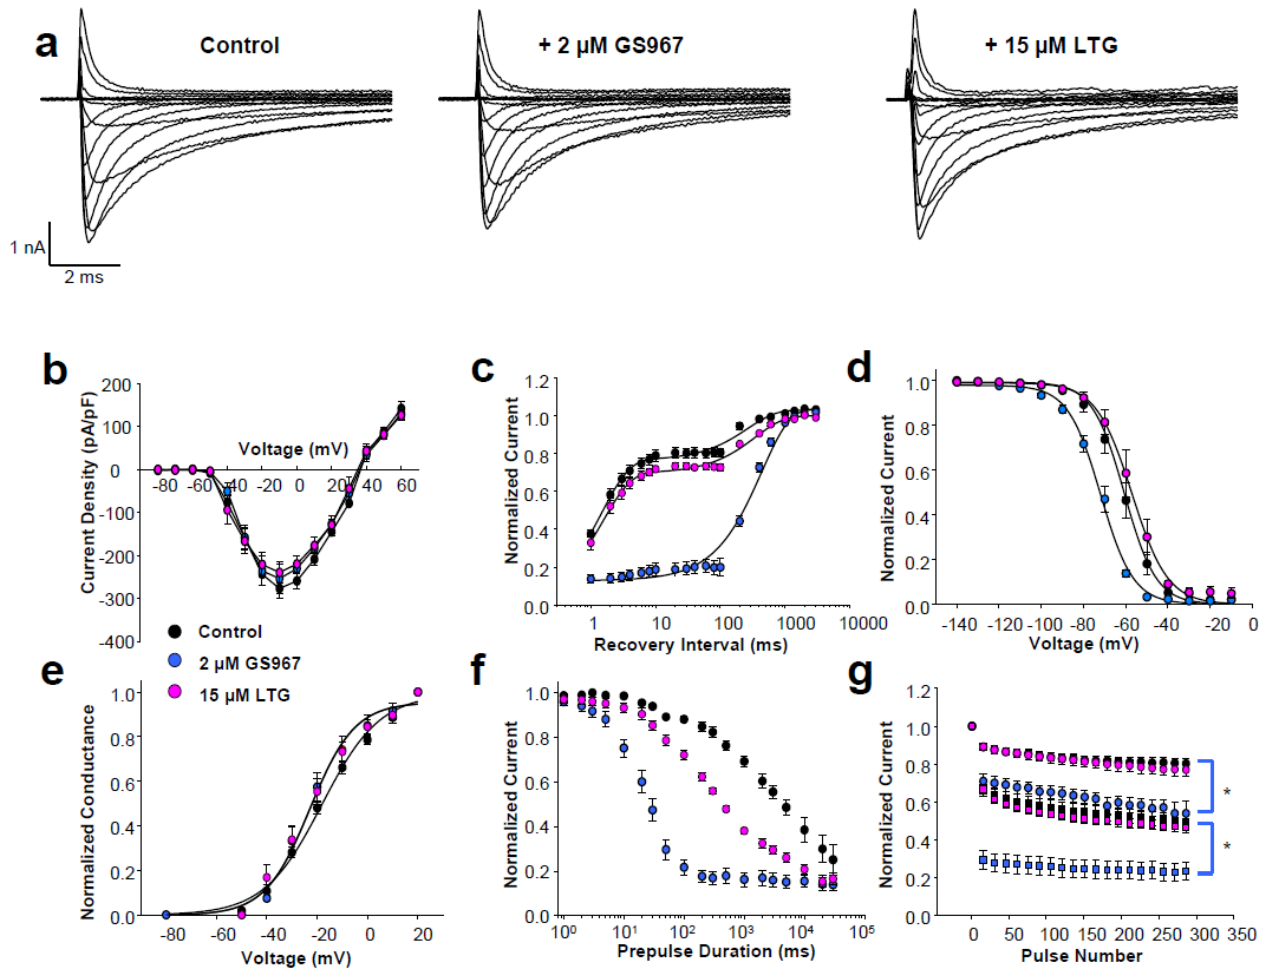

**Supplemental Figure S2 | GS967 inhibits peak current and stabilizes channel inactivation of voltage-gated sodium channels in hippocampal pyramidal neurons.** (a) Representative traces of sodium current in the absence (*left*) or presence either 2  $\mu\text{M}$  GS967 (*middle*) or 15  $\mu\text{M}$  lamotrigine (LTG, *right*). (b) Current-voltage relationship of neuronal voltage-gated sodium current in the presence or absence of GS967 or LTG. (c) Recovery from fast inactivation in the absence or presence of GS967 or LTG. (d) Steady-state channel inactivation in the absence or presence of GS967 or LTG. The  $V_{1/2}$  values derived from Boltzmann fits were  $-58.1 \pm 3.1$  mV ( $n = 8$ ),  $-71.5 \pm 2.1$  mV ( $n = 8$ ) and  $-57.4 \pm 3.5$  mV ( $n = 5$ ) for control, GS967-treated and LTG-treated neurons, respectively.  $V_{1/2}$  for GS967-treated neurons was significantly different from control ( $p=0.013$ ) and LTG-treated ( $p=0.003$ ). (e) Voltage-dependence of activation in the presence or absence of GS967 or Lamotrigine. (f) Onset of slow inactivation in the presence or absence of GS967 or LTG. (g) Use-dependent block in response to a 5 ms step to 0 mV from a holding potential of -120 mV at frequencies of 10 Hz (circles) or 100 Hz (squares) in the presence or absence of GS967 or LTG (\* $p < 0.001$  comparing control with GS967; Student's t-test). All data are expressed as mean  $\pm$  SEM, with  $n = 5 - 15$  for each condition

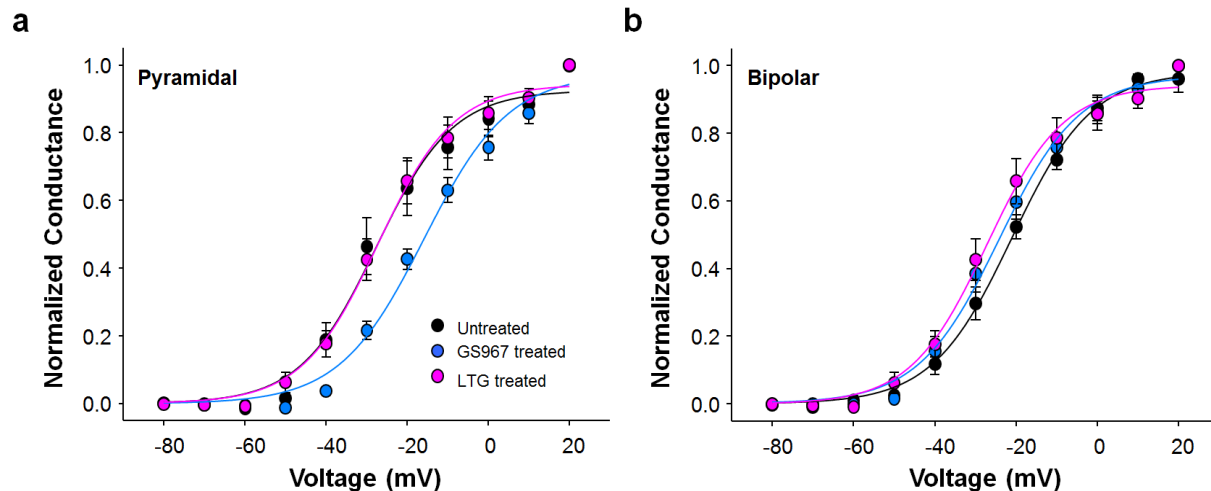

**Supplemental Figure S3 | Voltage-dependence of activation for neuronal sodium current.** Conductance-voltage relationships for voltage-dependent sodium current from (a) pyramidal neurons and (b) bipolar neurons isolated from untreated (black symbols), GS967-treated (blue symbols), or LTG-treated (purple symbols) *Scn1a*<sup>+/-</sup> mice. All data are expressed as mean ± SEM for n = 7 – 16 cells. Boltzmann fits to the data produced the following parameters:

| <i>Pyramidal neurons</i> | V <sub>1/2</sub> (mV) | Slope factor (k) | n  |
|--------------------------|-----------------------|------------------|----|
| Untreated                | -27.5 ± 3.3           | 8.6 ± 1.3        | 10 |
| GS967-treated            | -18.4 ± 1.0*          | 8.9 ± 0.4        | 16 |
| LTG-treated              | -26.3 ± 2.6           | 9.9 ± 1.9        | 7  |

\*  $p=0.029$  (untreated vs GS967); \*  $p=0.038$  (GS967 vs LTG)

***Bipolar neurons***

|               |             |            |   |
|---------------|-------------|------------|---|
| Untreated     | -21.0 ± 1.7 | 9.1 ± 1.0  | 7 |
| GS967-treated | -23.6 ± 2.6 | 9.5 ± 0.6  | 9 |
| LTG-treated   | -24.6 ± 1.7 | 10.1 ± 1.7 | 7 |

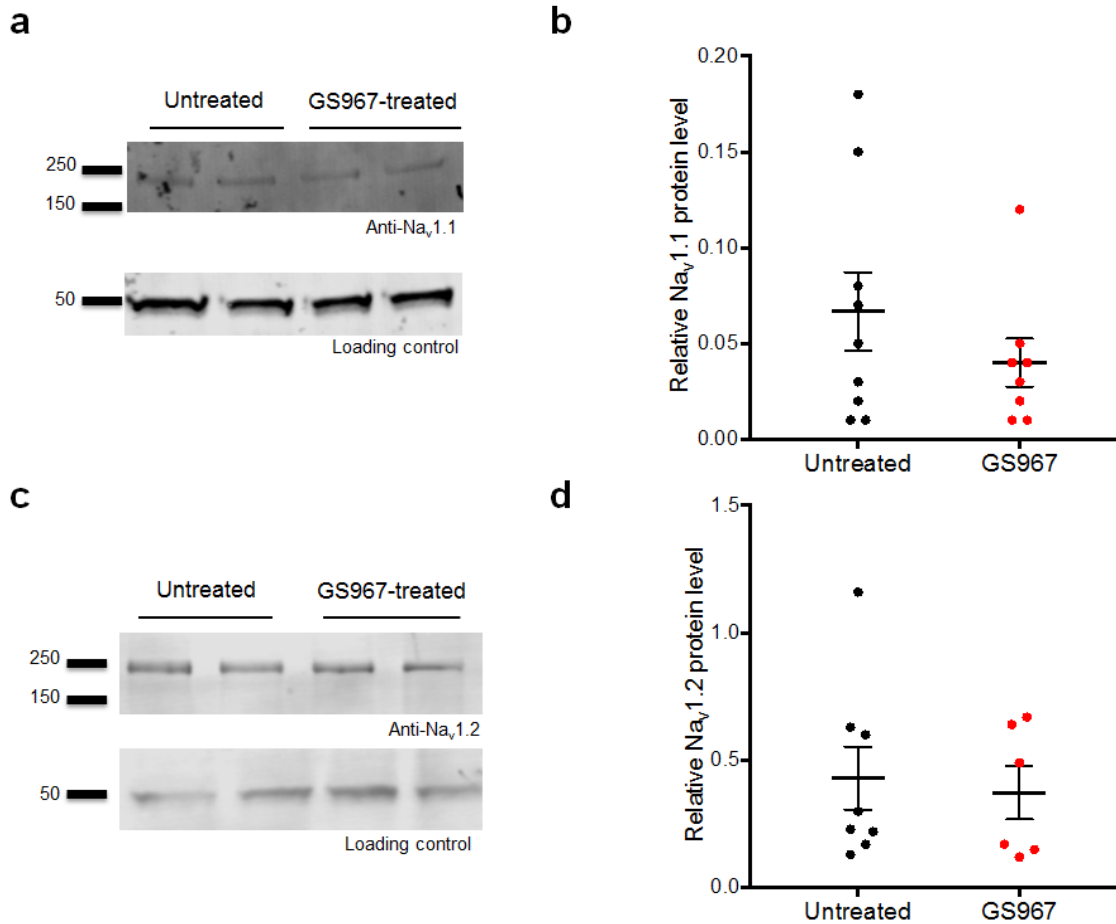

**Supplemental Figure S4 | GS967 has no effect on neuronal  $\text{Na}_v1.1$  and  $\text{Na}_v1.2$  expression in  $\text{Scn1a}^{+/-}$  mice.**

(a) Western blot analysis of  $\text{Na}_v1.1$  protein levels in hippocampal membrane preparations from  $\text{Scn1a}^{+/-}$  mice. Representative blots of two biological replicates are shown for untreated and GS967-treated mice. (b) Scatter plot of densitometric analysis of Western blot data. Data points represent the individual densitometry for untreated or GS967-treated mice. The average densitometry values are depicted by the thick black line. Error bars represent SEM, with  $n=8-9$  mice per treatment. There is no statistical difference between groups. (c) Western blot analysis of  $\text{Nav}1.2$  protein levels in hippocampal membrane preparations from  $\text{Scn1a}^{+/-}$  mice. Representative blot from two biological replicates are shown for untreated and GS967-treated mice. (d) Scatter plot of densitometric analysis of Western blot data. Data points represent the individual densitometry for untreated or GS967-treated mice. The average densitometry values are depicted by the thick black line. Error bars represent SEM, with  $n=6-8$  per treatment. There is no statistical difference between groups.

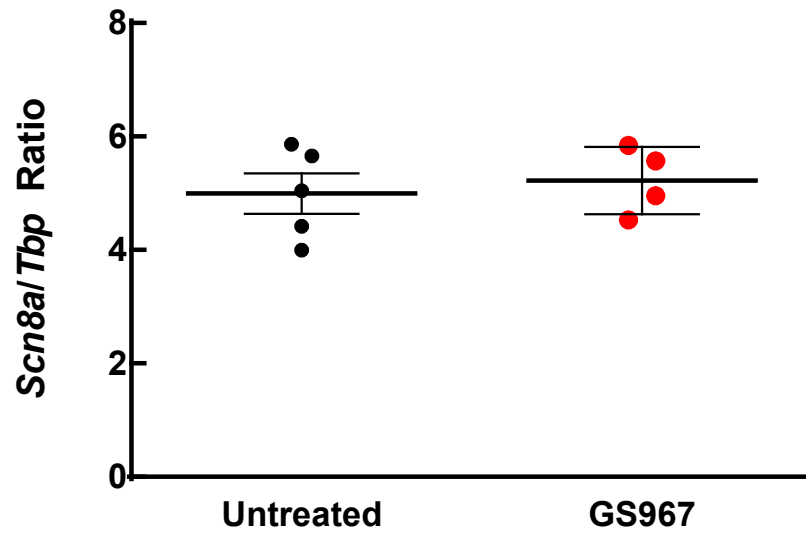

**Supplemental Figure S5 | Comparison of *Scn8a* transcript expression in untreated and GS967-treated *Scn1a*<sup>+/-</sup> mice.**

Data represent relative hippocampal transcript levels determined by ddPCR. Data are expressed as a ratio of *Scn8a* to *Tbp*. Data represent the average *Scn8a/Tbp* ratio ( $\geq 2$  technical replicates) for individual untreated or GS967-treated mice. The average *Scn8a/Tbp* ratios are depicted by the thick black line. Error bars represent SEM, with  $n = 4-5$  mice per group. There is no statistical difference between groups.

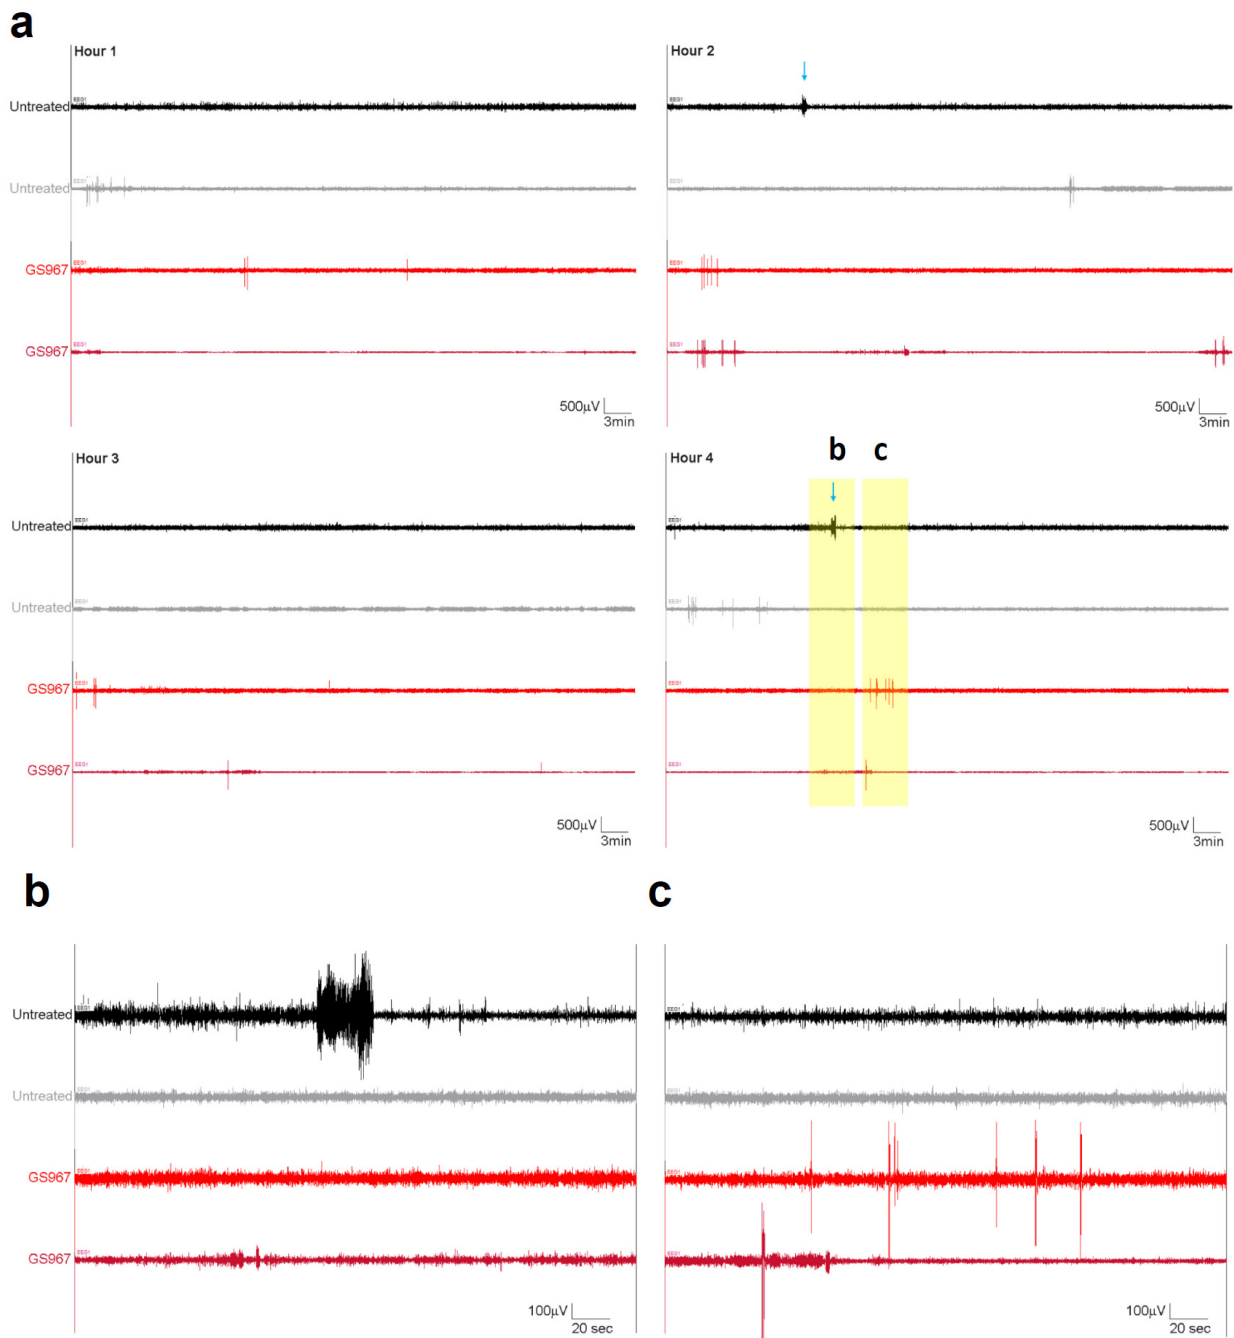

**Supplemental Figure S6 | Representative EEG records from untreated and GS967-treated *Scn1a*<sup>+/-</sup> mice.**

(a) Four continuous hours of EEG from one channel is displayed for two untreated and two GS967-treated *Scn1a*<sup>+/-</sup> mice. Blue arrows mark GTC seizures. (b,c) Zoomed images of the yellow shaded segments from (a) showing a representative GTC (b) and high amplitude non-ictal events (c).

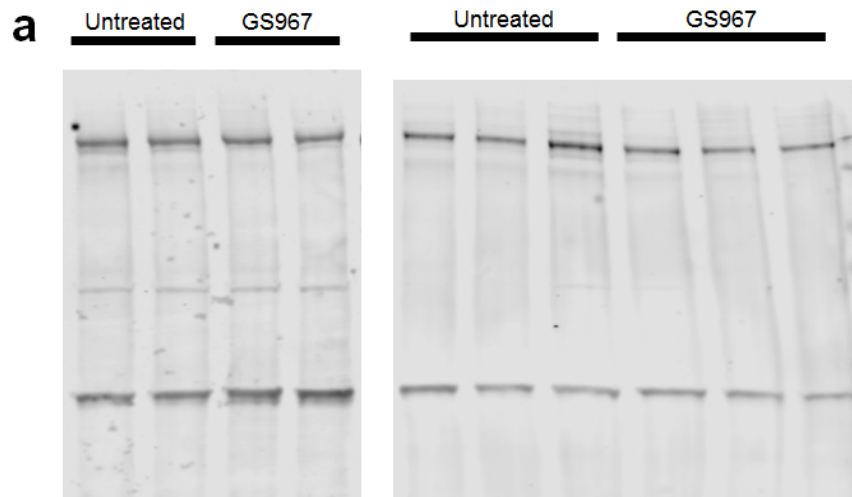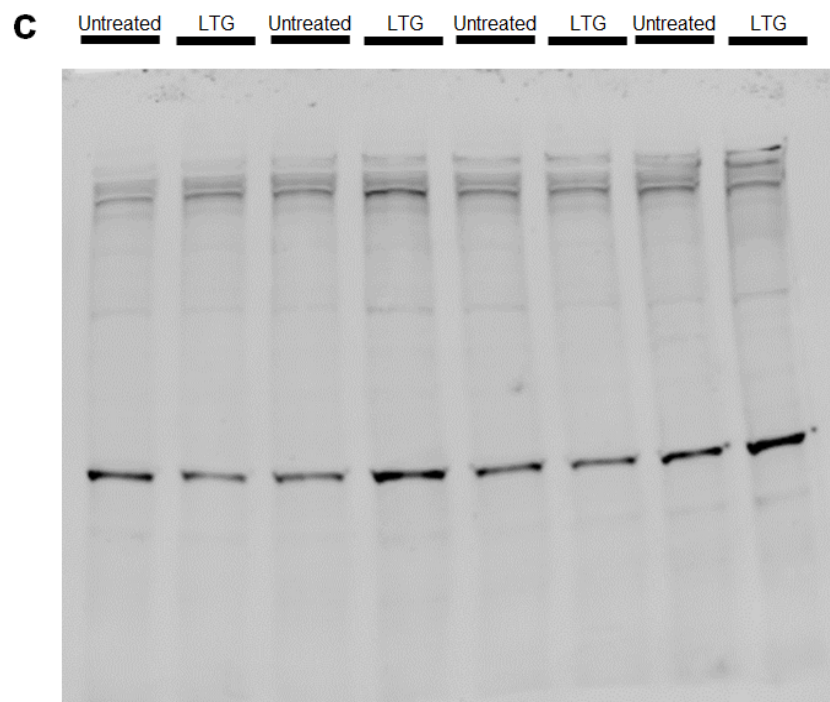

Supplemental Figure S7 | Full-length western blot images corresponding to Fig. 5.
